# Supplementary material for: Silver Ions Drive Ordered Self-Assembly Mechanisms and Inherent Properties of Lignin Nanoflowers
Source: MDPI journal article supplement (doi:10.3390/polym15173541), 2023-08-25
Supplement: s1 [file s1]

# Silver Ions Drive Ordered Self-Assembly Mechanisms and Inherent Properties of Lignin Nanoflowers

Kai Chen <sup>1,2,3,\*</sup>, Encheng Liu <sup>2</sup>, Shengrong Yuan <sup>4</sup> and Baoquan Zhang <sup>1,\*</sup>

<sup>1</sup> State Key Laboratory of Chemical Engineering, School of Chemical Engineering and Technology, Tianjin University, Tianjin 300072, China

<sup>2</sup> College of Textile Science and Engineering (International Institute of Silk), Zhejiang Sci-Tech University, Hangzhou 310018, China

<sup>3</sup> Key Laboratory of Green Cleaning Technology & Detergent of Zhejiang Province, Lishui 323000, China

<sup>4</sup> Zhejiang Provincial Innovation Center of Advanced Textile Technology, Shaoxing 312000, China

\* Correspondence: chen kai@zstu.edu.cn (K.C.); bqzhang@tju.edu.cn (B.Z.)

Table S1. Kinetic model parameters of  $\text{Ag}^+$  in different carboxymethylated lignin solution

| Samples  | Pseudo-first-order    |                    |        | Pseudo-second-order                       |                    |        |
|----------|-----------------------|--------------------|--------|-------------------------------------------|--------------------|--------|
|          | $K_1$                 | $Q_{e,\text{cal}}$ | $R^2$  | $K_2$                                     | $Q_{e,\text{cal}}$ | $R^2$  |
|          | ( $\text{min}^{-1}$ ) | ( $\text{mg/g}$ )  |        | ( $\text{g}/(\text{mg}\cdot\text{min})$ ) | ( $\text{mg/g}$ )  |        |
| EHL      | 0.2404                | 380.4              | 0.9382 | 0.0022                                    | 546.4              | 0.9839 |
| EHL-CM-1 | 0.2121                | 673.9              | 0.9592 | 0.0009                                    | 1021.8             | 0.9891 |
| EHL-CM-2 | 0.2254                | 801.3              | 0.9277 | 0.0011                                    | 1981.7             | 0.9971 |

Table S2. Thermodynamic parameters of  $\text{Ag}^+$  in EHL-CM-2 solution

| Temperature<br>( $^{\circ}\text{C}$ ) | Langmuir         |                   |         |        | Freundlich        |        |        |
|---------------------------------------|------------------|-------------------|---------|--------|-------------------|--------|--------|
|                                       | b                | $Q_{\text{em}}$   | $K_c$   | $R^2$  | $K_f$             | n      | $R^2$  |
|                                       | ( $\text{L/g}$ ) | ( $\text{mg/g}$ ) |         |        | ( $\text{L/mg}$ ) |        |        |
| 60                                    | 0.339            | 1234.5            | 244588  | 0.9997 | 713.03            | 7.522  | 0.9843 |
| 70                                    | 0.778            | 2186.2            | 561327  | 0.9996 | 1666.12           | 16.113 | 0.9816 |
| 80                                    | 4.514            | 3074.9            | 3256851 | 0.9999 | 2934.05           | 86.505 | 0.9807 |

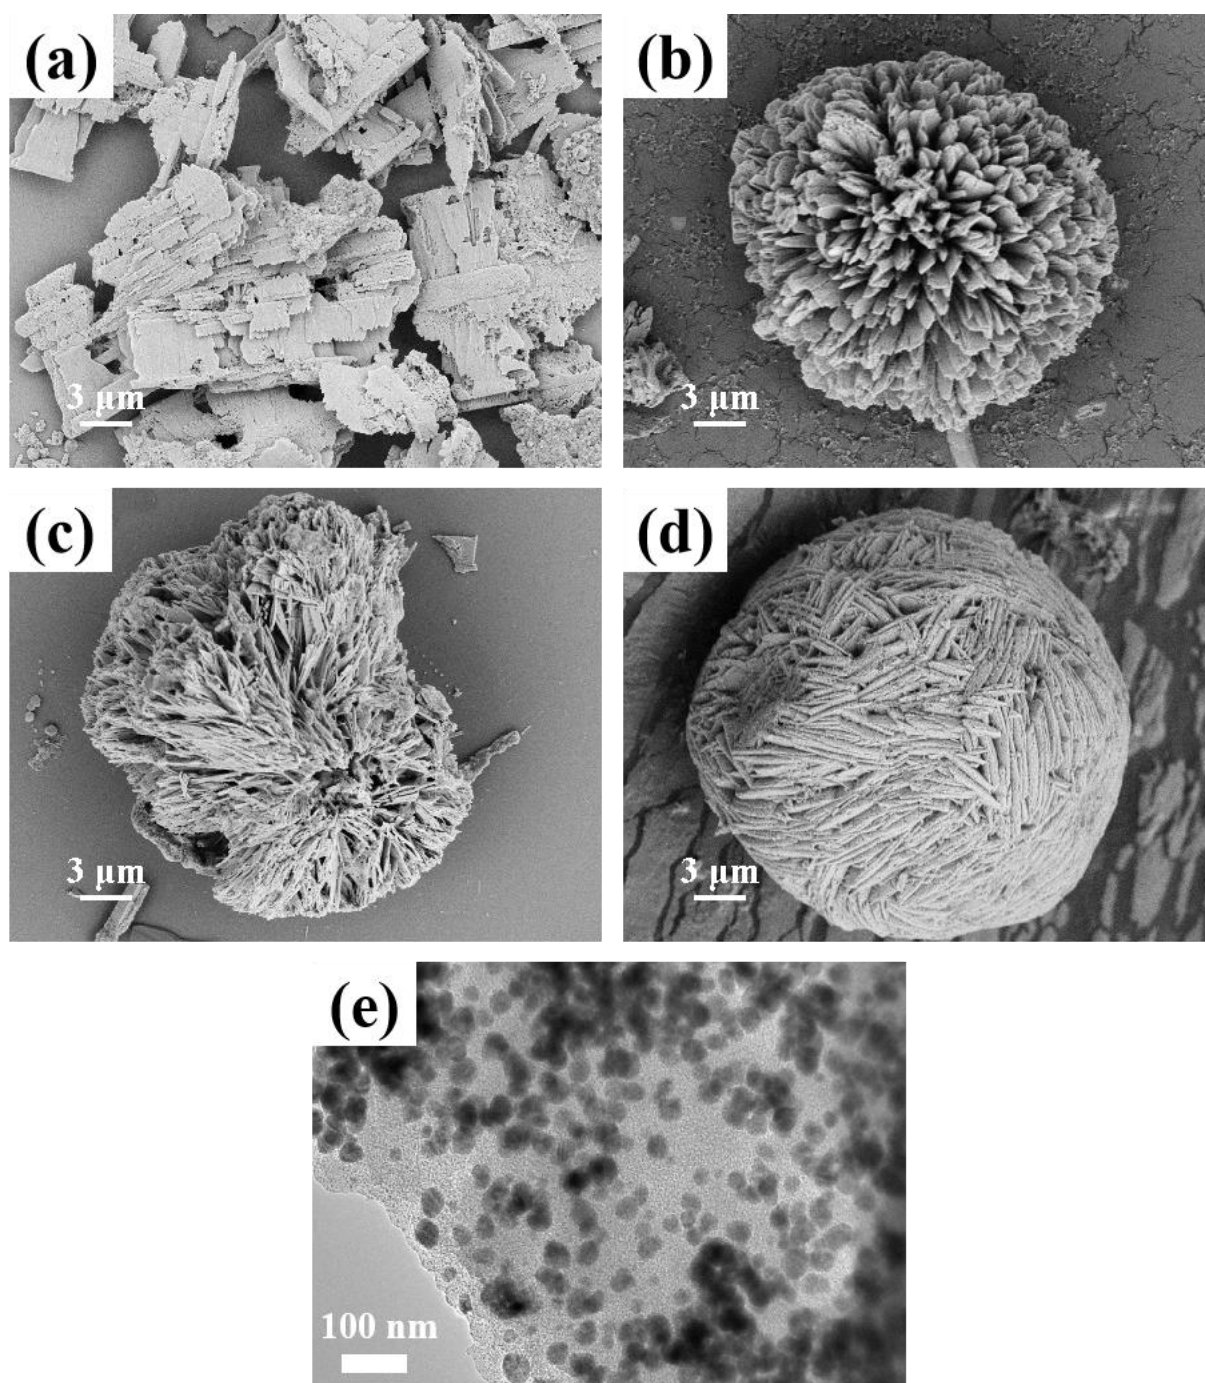

Figure S1. Aggregation morphology of carboxymethylated lignin with different concentration ((a) 0.01 g, (b) 0.05 g (c) 0.10 g and (d) 0.20 g) in  $\text{AgNO}_3$  solution with 70 °C, (e) TEM image of carboxymethyl lignin-Ag layered nanoflower

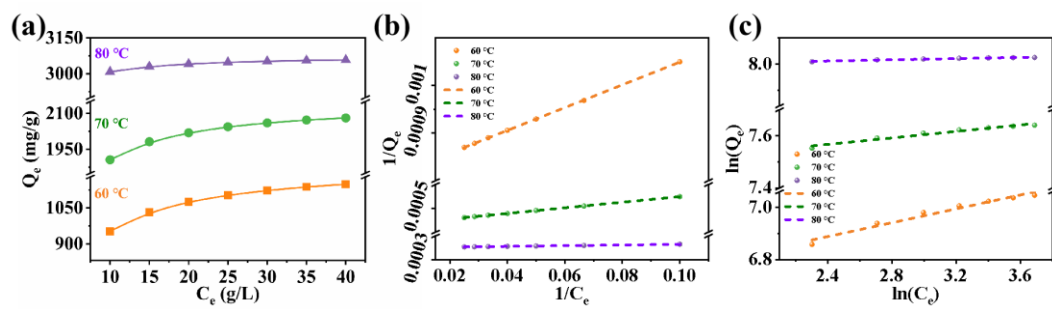

Figure S2. (a) Adsorption isotherm of  $\text{Ag}^+$  in EHL-CM-2, (b) Langmuir model of  $\text{Ag}^+$  in EHL-CM-2, (c) Freundlich model of  $\text{Ag}^+$  in EHL-CM-2

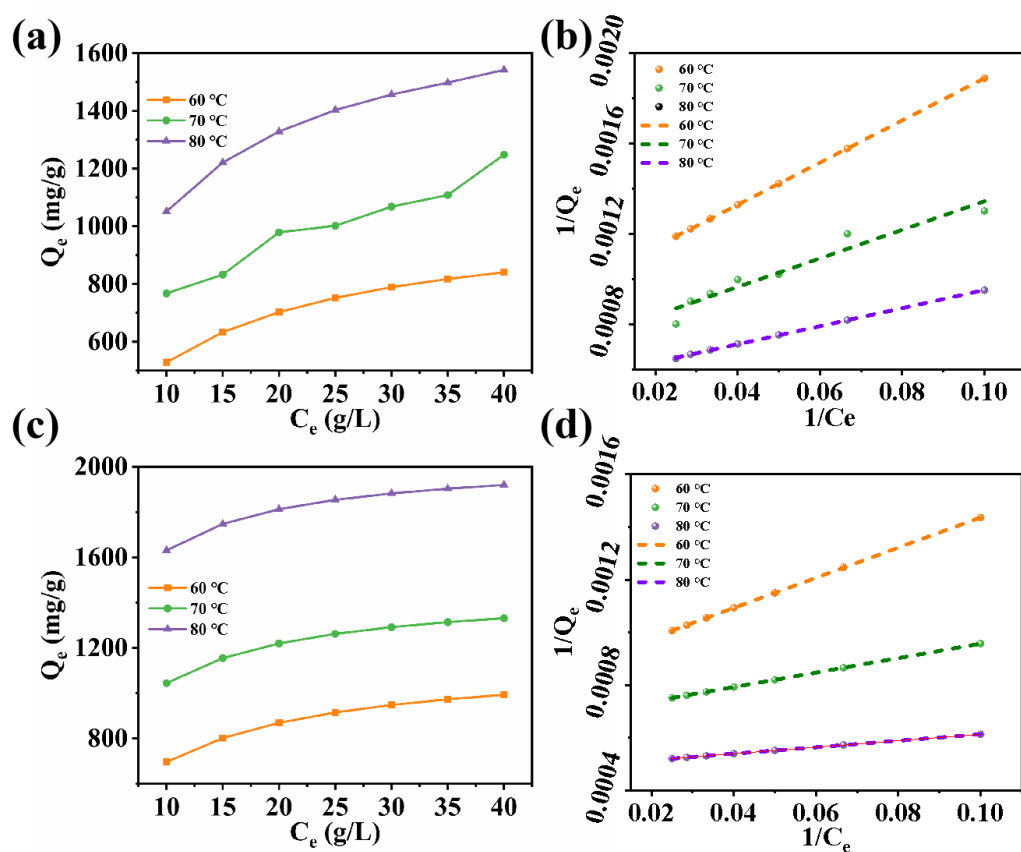

Figure S3. (a) Adsorption isotherm of  $\text{Ag}^+$  in EHL, (b) Langmuir model of  $\text{Ag}^+$  in EHL, (c) Adsorption isotherm of  $\text{Ag}^+$  in EHL-CM-1, (d) Langmuir model of  $\text{Ag}^+$  in EHL-CM-1

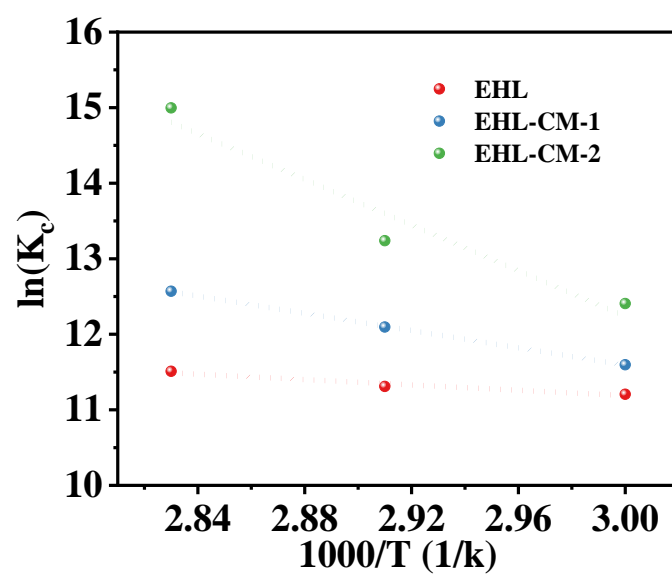

Figure S4. The  $\Delta G$  for adsorption of  $\text{Ag}^+$  in carboxymethylated lignin with the increase of temperature
